# Supplementary material
Source: PubMed Central journal article supplement (PMC3837830)

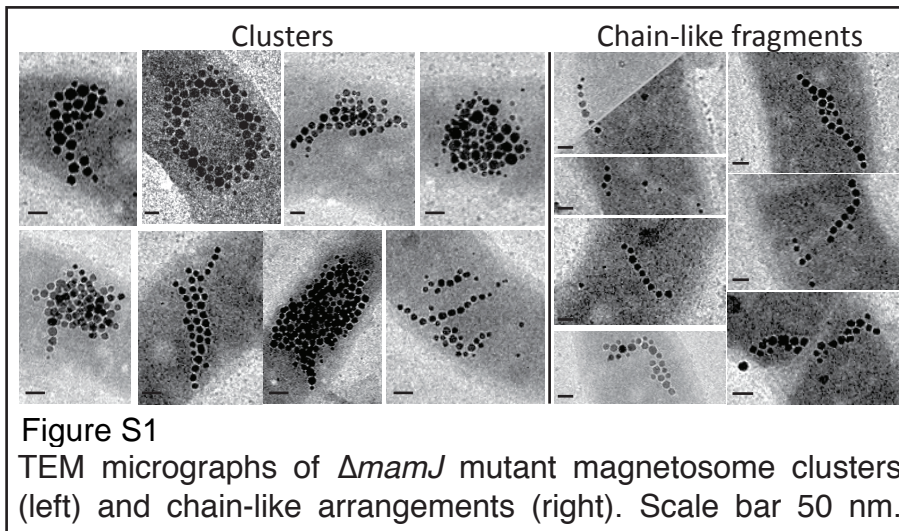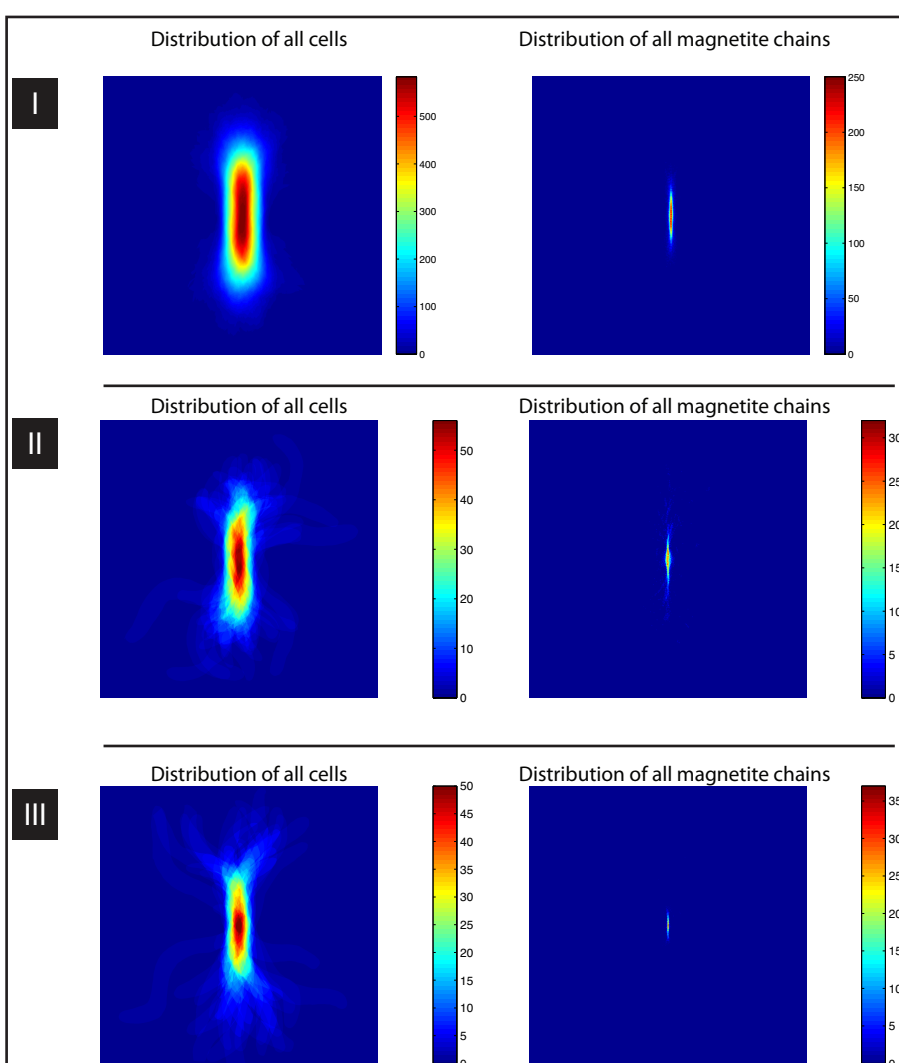

Figure S2  
CHAP heat map representation to visualize MC and cell envelope distribution. Red indicates areas with high and blue with low abundance of aligned cell bodies (left) or magnetite particles (MCs, right). (I) Representation of all cells and MCs analyzed in Fig. 1 and 2. (II) Heat maps of  $\Delta mamJ$ ,  $\Delta mamK$  and WT cells of Fig. 3 IV and (III)  $\Delta mamK$  cells of Fig. 3 V only.

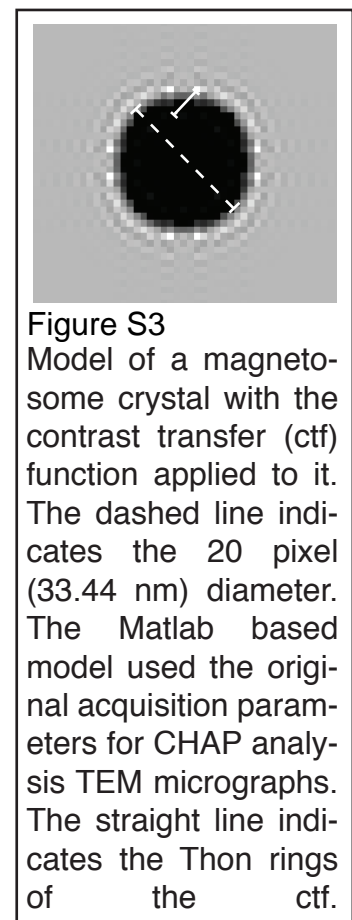

Supplement: AEM.02143-13_zam999104957so1.pdf [file AEM.02143-13_zam999104957so1.pdf]
